# Supplementary material
Source: publisher figshare collection journal article supplement (https://karger.figshare.com/articles/dataset/_/13019744)
Supplement: Supplementary file 1 [file 1]

**Supplementary Table 1** Comparison of postoperative outcomes following vitrectomy due to vitreous haemorrhage secondary to Proliferative Diabetic Retinopathy at 3 months postoperatively.

| Postoperative Outcome                                       | ILM clean GROUP<br>(n=40)                   | Control Group<br>(n=39)                      | p     |
|-------------------------------------------------------------|---------------------------------------------|----------------------------------------------|-------|
| Foveal ERM (0-2) (n, %)                                     | None – 38 (95%)<br>1 – 2 (5%)<br>2 – 0 (0%) | None – 32 (82%)<br>1 – 7 (18%)<br>2 – 0 (0%) | 0.09  |
| Eccentric ERM (0-2) (n, %)                                  | 0 – 21 (53%)<br>1 – 18 (45%)<br>2 – 1 (2%)  | 0 – 10 (26%)<br>1 – 21 (54%)<br>2 – 8 (20%)  | 0.008 |
| Clinically significant ERM (present)<br>(n, %)              | 0 (0%)                                      | 5 (13%)                                      | 0.03  |
| Postoperative visual acuity (logMAR)<br>(mean, SD, min-max) | 0.34, 0.23 (0.1-1.3)                        | 0.45, 0.30 (0.1-1.3)                         | 0.07  |
| CMT (microns)<br>(mean, SD, min-max)                        | 294, 51 (223-420)                           | 332, 86 (198-593)                            | 0.02  |
| Macular Volume (mm <sup>3</sup> )<br>(mean, SD, min-max)    | 8.0, 1.3 (5.3-10.3)                         | 8.4, 1.2 (5.4-11.2)                          | 0.19  |
| CMT >400 microns (present) n, (%)                           | 3 (8%)                                      | 5 (13%)                                      | 0.48  |

*ILM: Inner Limiting Membrane, ERM: Epiretinal Membrane, SD: Standard Deviation, CMT: Central Macular Thickness*
